# Supplementary material for: Dysregulation of miRNA Expression in Cancer Associated Fibroblasts (CAFs) and Its Consequences on the Tumor Microenvironment
Source: PubMed Central journal article supplement (PMC5483873; doi:10.3390/cancers9060054), 2017-05-24
Supplement: cancers-09-00054-s001.pdf [file cancers-09-00054-s001.pdf]

## Supplementary Materials: Dysregulation of miRNA Expression in Cancer Associated Fibroblasts (CAFs) and Its Consequences on the Tumor Microenvironment

Maren Schoepp, Anda Jana Ströse and Jörg Haier

Supplemental Table S1 MiRs identified with specific roles in fibroblasts under pathological conditions

| Cell type | miRNA                   | Direction of deregulation                                | Type of validation                                                                                                    | Functional effect in NFs turning to CAFs                                       | Interaction in CAFs                  | Ref. |
|-----------|-------------------------|----------------------------------------------------------|-----------------------------------------------------------------------------------------------------------------------|--------------------------------------------------------------------------------|--------------------------------------|------|
| OC        | 31<br>214<br>155        | ↓                                                        | in vivo: paired samples of CAF (metastasis) and NF; in vitro: NF co-cultured with HeyA8 OC cells                      | proliferation ↑                                                                | cytokines ↑<br>target: CCL5          | [5]  |
| EC        | 31                      | ↓                                                        | in vitro: paired samples of EC tissue and tumor free tissue; in vivo: mouse xenograft model                           | migration, invasion of NFs ↑                                                   | target: SATB2 ↑                      | [11] |
|           | 148a                    | ↓                                                        | in vitro: paired samples of EC tissue and tumor free tissue                                                           |                                                                                | target: WNT10B                       | [10] |
| BC        | 26b                     | ↓                                                        | in vitro: paired samples of BC tissue and tumor free tissue culture models                                            | ↓                                                                              | targets: TNKSIBPI, CPSF7, COL12A1    | [12] |
|           | 31                      | ↑                                                        | in vitro: BC tissue compared with tumor free tissue                                                                   | activation ↑                                                                   | α-SMA, IL-6 ↑, pathway: TGF-β ↑      | [14] |
|           | 221                     | ↑                                                        |                                                                                                                       |                                                                                |                                      |      |
|           | 200b                    | ↓                                                        |                                                                                                                       |                                                                                |                                      |      |
|           | 200c                    | ↓                                                        |                                                                                                                       |                                                                                |                                      |      |
|           | 101                     | ↓                                                        |                                                                                                                       |                                                                                |                                      |      |
|           | 141                     | ↓                                                        |                                                                                                                       |                                                                                |                                      |      |
|           | 342                     | ↓                                                        |                                                                                                                       |                                                                                |                                      |      |
|           | 205,<br>let -7g,<br>26b | ↓                                                        |                                                                                                                       |                                                                                |                                      |      |
|           | 127                     | ↓                                                        | in vitro: BC cell lines and sets of primary breast tumors and adjacent normal tissues from the same patients          | proliferation ↑                                                                | p53/p21 ↑<br>target: BCL6 oncogene ↑ | [46] |
|           | 22                      | ↑                                                        | in vitro: epithelial and BC cell lines, in vivo: by inducing cellular senescence in a mouse model of breast carcinoma | proliferation ↓                                                                | targets: CDK6, SIRT1, and Sp1 genes  | [71] |
|           | 92                      | ↓                                                        | in vitro: tissue samples and in breast epithelium and stroma during BC progression                                    | expression of miR in FIBs ↓                                                    |                                      | [13] |
| 146b      | ↓                       | in vitro and in vivo: tissue samples with and without BC | activation ↑                                                                                                          | IL-6 ↑<br>(p 16 related)                                                       | [41]                                 |      |
| 200       | ↓                       | in vitro                                                 | activation ↑                                                                                                          | α-SMA ↑<br>targets: Fli-1 is directly regulated by miR-200c, TCF12 is directly | [3]                                  |      |

| Cell type | miRNA         | Direction of deregulation | Type of validation                                                                                                                                           | Functional effect in NFs turning to CAFs | Interaction in CAFs                                                                                                              | Ref. |
|-----------|---------------|---------------------------|--------------------------------------------------------------------------------------------------------------------------------------------------------------|------------------------------------------|----------------------------------------------------------------------------------------------------------------------------------|------|
|           |               |                           |                                                                                                                                                              |                                          | targeted by miR-141 -> ECM remodeling ↑                                                                                          |      |
|           | 365           | ↓                         | in vitro, in vivo                                                                                                                                            | ↓                                        | IL6 ↑<br>pathway: p38 MAPK ↓<br>target: NF-κBp65 ↑                                                                               | [63] |
| GC        | 106b          | ↑                         | in vitro: paired samples of GC tissue and tumor free tissue                                                                                                  | proliferation ↑, motility ↑              | α-SMA ↑, TGF-β ↑ target: PTEN                                                                                                    | [23] |
|           | 200b          | ↓                         | in vitro: gastric cancer cell lines compared with CAF; in vivo: mouse xenograft model;<br>clinicopathological: comparing miR-200b expression in 173 patients | activation ↑                             | α-SMA ↑<br>targets: ZEB1, ZEB2 ↑ ; repressed E-cadherin expression                                                               | [15] |
|           | 149           | ↓                         | in vitro: GC cell lines, fibroblasts from tumor tissues and non-tumor tissues, in vivo: mouse xenograft model                                                | activation ↑                             | IL6 ↑ -> EMT (epithelial-to-mesenchymal transition) ↑<br>target: PGE2 induces the epigenetic silencing of miR-149 in fibroblasts | [79] |
|           | 145           | ↑                         | in vitro: tissue samples and cell lines                                                                                                                      | activation ↑                             | α-SMA ↑<br>pathway: TGF-β ↑                                                                                                      | [25] |
|           | 143           | ↑                         | in vitro: tissue samples and cell lines, in situ hybridization                                                                                               | activation ↑                             | Collagen type III ↑ pathway: TGF-β/SMAD signaling ↑                                                                              | [24] |
| EOC       | 27a/b         | ↑                         | in vitro: serum expression of miR, from tissue with and without cancer                                                                                       | activation ↑                             | α-SMA ↑<br>pathway: TGF-β ↑                                                                                                      | [26] |
|           | 21            | ↑                         | in vitro: samples from patients with esophageal squamous-cell carcinoma, and a co-culture system of normal fibroblasts and esophageal cancer cells           | activation ↑                             |                                                                                                                                  | [40] |
| PaC       | 21            | ↑                         | in vitro: tumor and tumor free tissue                                                                                                                        | activation ↑                             | α-SMA ↑                                                                                                                          | [17] |
|           | 21            | ↑                         | in vitro: tumor and tumor free tissue                                                                                                                        | activation ↑                             |                                                                                                                                  | [17] |
|           | 222           | ↑                         | in vitro co-cultured experiments with: human normal and cancer associated stellate cells, human cancer associated fibroblast cells, human PaC cell lines     | activation ↑                             | α-SMA ↑                                                                                                                          | [4]  |
|           | 221           |                           |                                                                                                                                                              |                                          | α-SMA ↑,<br>targets: NF-κB, K-Ras ↑                                                                                              |      |
|           | 155           | ↑                         | in vitro: isolated primary pancreatic fibroblasts from mice co-cultured with pancreatic cancer cell lines                                                    | activation ↑ (by microvesicles)          | alpha SMA ↑ target: TP53INP1 ↓<br>by direct targeting of miR-155 and microvesicles                                               | [65] |
|           | 200a,<br>200b | ↑                         | in vitro: cell lines and tissue samples with and without cancer                                                                                              | activation ↑                             | target: SIP1 by promoter methylation and retain expression of E-cadherin, regulating EMT                                         | [16] |
| CRC       | 21            | ↑                         | in vitro: human cell lines and tissue samples with and without cancer                                                                                        | activation ↑                             | cytokines ↑, PDCD4 ↓(inversely correlated with miR expression)                                                                   | [27] |
| PC        | 205           | ↓                         | in vitro: cell culture                                                                                                                                       | activation ↑                             | inflammatory cytokine secretion ↓                                                                                                | [45] |

| Cell type | miRNA    | Direction of deregulation | Type of validation                                                                                                                      | Functional effect in NFs turning to CAFs | Interaction in CAFs                                                                                                | Ref. |
|-----------|----------|---------------------------|-----------------------------------------------------------------------------------------------------------------------------------------|------------------------------------------|--------------------------------------------------------------------------------------------------------------------|------|
|           |          |                           |                                                                                                                                         |                                          | target: HIF-1 ↑, EMT ↑                                                                                             |      |
|           | 409      | ↑                         | in vitro: prostate and bone and in patient tissue samples and cells, in vivo: mouse xenograft                                           | expression ↑                             | α-SMA, EMT ↑, extracellular vesicle(EV) release ↑                                                                  | [19] |
|           | 15<br>16 | ↓                         | in vitro: 23 non-neoplastic and tumor tissues samples, in situ hybridization, in vivo: mouse model                                      | ↓                                        | α-SMA ↑<br>targets: Fgf-2 and its receptor Fgfr1                                                                   | [20] |
|           | 133b     | ↑                         | in vitro: human PC cells and human prostate tissue with or without cancer                                                               | activation ↑                             | α-SMA, IL-6 ↑ pathway: TGF-β ↑                                                                                     | [22] |
| LC        | 101      | ↑                         | in vitro: human lung cell lines, and human lung tissue with and without cancer                                                          | proliferation ↑                          | pathway: PI3K-AKT ↓<br>targets: CXCL 12 ↓                                                                          | [21] |
|           | 200b     | ↑                         | in vitro: cell lines                                                                                                                    | activation ↑                             | α-SMA ↑<br>target: Flt 1 ↓                                                                                         | [42] |
| PSC       | 143      | ↑                         | Rat PSCs were isolated from the pancreas tissue of male Wistar rats. PSCs were activated in vitro by culture in serum-containing medium | activation ↑                             | interaction with p39 mitogen-activated protein kinase, extracellular-signal-regulated kinase, and SMAD 2/4 pathway | [74] |
|           | 221      | ↑                         |                                                                                                                                         |                                          | interaction with p40 mitogen-activated protein kinase, extracellular-signal-regulated kinase, and SMAD 2/5 pathway |      |
|           | 31       | ↑                         |                                                                                                                                         |                                          | interaction with p38 mitogen-activated protein kinase, extracellular-signal-regulated kinase, SMAD 2/3 pathway     |      |
|           | 126      | ↓                         |                                                                                                                                         |                                          | interaction with p41 mitogen-activated protein kinase, extracellular-signal-regulated kinase, SMAD 2/6 pathway     |      |
|           | 146a     | ↓                         |                                                                                                                                         |                                          | interaction with p42 mitogen-activated protein kinase, extracellular-signal-regulated kinase, SMAD 2/7 pathway     |      |
|           | 150      | ↓                         |                                                                                                                                         |                                          | interaction with p43 mitogen-activated protein kinase, extracellular-signal-regulated kinase, SMAD 2/8 pathway     |      |
|           | 210      | ↑                         | in vitro: Pancreatic cancer cells mono-cultured or indirectly co-cultured with PSCs                                                     | activation ↑                             | EMT ↑<br>pathway: ERK and Akt ↑                                                                                    | [61] |

| Cell type | miRNA     | Direction of deregulation | Type of validation                                                                                                 | Functional effect in NFs turning to CAFs | Interaction in CAFs                                                             | Ref. |
|-----------|-----------|---------------------------|--------------------------------------------------------------------------------------------------------------------|------------------------------------------|---------------------------------------------------------------------------------|------|
|           | 15b<br>16 | ↓                         | in vitro: rat PSC                                                                                                  | activation ↑                             | target: BCL-2 ↑                                                                 | [66] |
|           | 29        | ↓                         | in vitro: Immortalized mouse pancreatic stellate (mPSC) cell lines and tissue samples, in vivo: mouse model        | activation ↑                             | ECM ↑<br>pathway: TGF-β1 (SMAD3 dependent) ↑                                    | [57] |
| HSC       | 335       | ↓                         | in vitro: cultured HSC from rats                                                                                   | activation ↑                             | α-SMA and Collagen Type 1 ↑<br>target: TNC (tenascin-C) expression ↓            | [51] |
|           | 150       | ↑                         | in vitro: HSC isolated from sham-operated and bile duct-ligated rats compared with HSC isolated from fibrotic rats | activation ↓                             | α-SMA and Collagen Type 1 ↓<br>target: C-myb ↓                                  | [56] |
|           | 194       | ↑                         |                                                                                                                    |                                          | target: Rac 1 ↓                                                                 |      |
|           | 146a      | ↓                         | in vitro                                                                                                           | activation ↑                             | α-SMA and Col-1 ↑<br>targets: Wnt1 and Wnt5a ↑                                  | [59] |
|           | 146a      | ↓                         | in vitro: cell culture, in vivo: rat model                                                                         | activation ↑                             | α-SMA ↑, TGF-β ↑ by direct targeting of SMAD4                                   | [68] |
|           | 200a      | ↓                         | in vitro: cell culture, in vivo: rat model                                                                         | activation ↑                             | α-SMA ↑<br>pathway: Wnt/β-catenin and TGFβ ↑                                    | [47] |
|           | 200a      | ↑                         | no information                                                                                                     | activation ↓                             | α-SMA ↓, EMT process ↓, Gli2 (downstream signaling protein of the Hh pathway) ↓ | [81] |
|           | 9a        | ↑                         | in vitro: cell culture, in vivo: rat model                                                                         | activation ↑                             | target: SIRT1                                                                   | [72] |
|           | 17        | ↑                         | no information                                                                                                     | activation ↑                             | Collagen Type I and α-SMA ↑, TGF-β 1 ↑, SMAD7 ↓ (direct target)                 | [38] |
|           | 33a       | ↑                         | in vitro: cell culture and human liver and serum samples                                                           | activation ↑                             | α1 Collagen (Col1A1) and α-SMA ↑, TGF-β1 ↑, PI3K/Akt pathway target: PPAR-α     | [30] |
|           | 200b      | ↑                         | in vitro: human hepatic stellate cell line                                                                         | proliferation, migration ↑               | PI3K/Akt through FOG2 ↓-regulation                                              | [31] |
|           | 21        | ↑                         | in vitro: human immortalized HSC line                                                                              | activation ↑                             | Collagen Type I and α-SMA ↑, PTEN/Akt pathway                                   | [54] |
|           | 130a/b    | ↑                         | in vitro: immortalized rat HSC line, in vivo: rat model                                                            | activation ↑                             | ECM ↑<br>target: PPARγ ↓                                                        | [70] |
|           | 30, 193   | ↓                         | in vitro: hepatic fibrosis and human tissue samples, in vivo: mouse model                                          | activation ↑                             | TGF-β, TGF-β2 and SNAIL1 as potential targets                                   | [34] |
|           | 144       | ↓                         | in vitro: human tissue samples                                                                                     | activation ↑                             | α-SMA ↑, TGF-β1 ↑                                                               | [36] |
|           | 146a      | ↓                         | in vivo: cell culture                                                                                              | activation ↑                             | TGF-β1 ↑<br>target: SMDA4                                                       | [68] |

| Cell type | miRNA              | Direction of deregulation | Type of validation                                                      | Functional effect in NFs turning to CAFs | Interaction in CAFs                                                                                                              | Ref. |
|-----------|--------------------|---------------------------|-------------------------------------------------------------------------|------------------------------------------|----------------------------------------------------------------------------------------------------------------------------------|------|
|           | 126                | ↑                         | no information                                                          | activation ↑                             | TGF-β1, IκBα protein expression ↓<br>pathway: NF-κB                                                                              | [44] |
|           | 221<br>222         | ↑                         | in vitro: cell culture and liver biopsy specimens, in vivo: mouse model | activation ↑                             | α1-Collagen and α-SMA ↑                                                                                                          | [32] |
|           | 19b (-1/-2)        | ↓                         | in vitro: rat HSCs, in vivo: rat model                                  | activation ↑                             | Type I Collagen ↑, expression of α1(I) and α2(I) procollagen in mRNAs ↑<br>pathway: TGF-β ↑ targets: TGF-β 2 receptor and SMAD 3 | [33] |
|           | 101                | ↑                         | in vitro: Primary rat and mouse HSCs, in vivo: mouse model              | activation ↓                             | targets: TβRI and KLF6, inhibiting TGFβ signalling pathway                                                                       | [49] |
|           | 31                 | ↑                         | in vitro: human tissue samples, in vivo: rat model                      | activation ↑                             | TGF-β ↑                                                                                                                          | [52] |
|           | 19b (19b-1, 19b-2) | ↑                         | in vitro: tissue samples, in vivo: rat model                            | activation ↓                             | target: GRB2                                                                                                                     | [64] |
|           | 34a/               | ↑                         | in vitro: human HSC line, in vivo: rat model                            | activation ↑                             | α-SMA ↑<br>target: PPARγ ↓                                                                                                       | [69] |
|           | 21                 | ↑                         | in vitro: human tissue samples, rat HSC cell line                       | activation ↑                             | induces hepatocyte EMT<br>pathway: ERK1 targets: SPRY2, HNF4α                                                                    | [28] |
|           | 101                | ↑                         | in vitro: Primary rat and mouse HSCs, in vivo: mouse model              | activation ↓                             | TGFβ signaling ↓ by suppressing TβRI/KLF6 (targets)                                                                              | [49] |
|           | 181 b              | ↑                         | in vitro: human cell line, in vivo: rat model                           | activation ↑                             | α-SMA and Type I Collagen ↑<br>pathway: PI3K/Akt ↑<br>target: PTEN expression ↓                                                  | [54] |
|           | 200a               | ↑                         | in vitro: HSC-T6 cell lines, in vivo: rat model                         | activation ↓                             | pathway/ targets: Keap1/Nrf2; Nrf2 ↑ inhibits TGF-β1 induced growth                                                              | [73] |
|           | 483                | ↑                         | in vitro: cell lines, in vivo: mouse model                              | activation ↓                             | TGF-β ↓<br>targets: TIMP-2 and PDGF-β ↓                                                                                          | [62] |
|           | 21                 | ↑                         | in vivo: mouse model                                                    | activation ↑                             | TGF-β, α-SMA ↑ targets: PDCD4/AP-1 ↑                                                                                             | [29] |
|           | 126                | ↓                         | in vitro: primary rat HSC, in vivo: rat model                           | activation ↑                             | PI3K, p-AKT ↑                                                                                                                    | 82   |
|           | 29a                | ↓                         | in vitro: mice HSC, in vivo: mouse model                                | activation ↑                             | alpha SMA ↑ target: HDAC4 ↑                                                                                                      | [58] |
|           | 150                | ↑                         | in vitro: human cell lines                                              | activation ↓                             | alpha SMA ↓ targets: Sp1 and Col4A4                                                                                              | [83] |
|           | 133a               | ↓                         | in vitro: cell lines, in vivo: mouse model                              | activation ↑                             | TGF-β, collagen ↑                                                                                                                | [35] |
| HSC       | 122                | ↓                         | in vitro: rat HSC, in vivo: rat model                                   | activation ↑                             | collagen maturation and ECM production ↑                                                                                         | [50] |

| Cell type | miRNA       | Direction of deregulation | Type of validation                                     | Functional effect in NFs turning to CAFs | Interaction in CAFs                                             | Ref. |
|-----------|-------------|---------------------------|--------------------------------------------------------|------------------------------------------|-----------------------------------------------------------------|------|
|           |             |                           |                                                        |                                          | target: P4HA1 ↓, binding activity of C/EBPα to miR-122 promoter |      |
| HSC       | 181b        | ↑                         | in vitro: serum samples and human cell lines           | activation ↑                             | TGF-β ↑<br>target: p27                                          | [39] |
| HSC       | 26a         | ↓                         | in vitro: primary rat HSC, in vivo: rat                | activation ↑                             | Collagen Type I, Cox-2 protein expression, NF-κB ↑              | [60] |
|           | 29a         | ↑                         |                                                        |                                          |                                                                 |      |
|           | 214         | ↓                         |                                                        |                                          |                                                                 |      |
|           | 146a        | ↓                         |                                                        |                                          |                                                                 |      |
| HSC       | 199a, 199a* | ↑                         | in vitro: human clinical samples, in vivo: mouse model | activation ↑                             | TGF-β ↑                                                         | [37] |
|           | 200a, 200b  | ↑                         |                                                        |                                          |                                                                 |      |
| HSC       | 16          | ↓                         | in vitro: rat HSC                                      | activation ↑                             | CD1, Bcl-2 ↑                                                    | [67] |
| HSC       | 27a/b       | ↑                         | in vitro: rat HSC                                      | activation ↑                             | target: retinoid X receptor alpha                               | [84] |

(CAF, HSC, PSC) OC (Ovarian Cancer), EC (Endometrial Cancer), BC (Breast Cancer), GC (Gastric Cancer), EOC (Esophageal Squamous cell carcinoma), PaC (Pancreatic Carcinoma), CRC (Colorectal Cancer), PC (Prostate Cancer), LC (Lung Cancer).

## References

75. Baroni, S.; Romero-Cordoba, S.; Plantamura, I.; Dugo, M.; D'Ippolito, E.; Cataldo, A.; Cosentino, G.; Angeloni, V.; Rossini, A.; Daidone, M.; et al. Exosome-mediated delivery of miR-9 induces cancer-associated fibroblast-like properties in human breast fibroblasts. *Cell Death Dis.* **2016**, *7*, e2312, doi:10.1038/cddis.2016.224.
76. Nouraei, N.; Khazaei, S.; Vasei, M.; Razavipour, S.F.; Sadeghizadeh, M.; Mowla, S.J. MicroRNAs contribution in tumor microenvironment of esophageal cancer. *Cancer Biomark.* **2016**, *16*, 367–376.
77. Takikawa, T.; Masamune, A.; Yoshida, N.; Hamada, S.; Kogure, T.; Shimosegawa, T. Exosomes Derived from Pancreatic Stellate Cells: MicroRNA Signature and Effects on Pancreatic Cancer Cells. *Pancreas* **2017**, *46*, 19–27.
79. Au Yeung, C.L.; Co, N.N.; Tsuruga, T.; Yeung, T.L.; Kwan, S.Y.; Leung, C.S.; Li, Y.; Lu, E.S.; Kwan, K.; Wong, K.K.; et al. Exosomal transfer of stroma-derived miR21 confers paclitaxel resistance in ovarian cancer cells through targeting APAF1. *Nat. Commun.* **2016**, *7*, 11150.
80. Li, P.; Shan, J.X.; Chen, X.H.; Zhang, D.; Su, L.P.; Huang, X.Y.; Yu, B.Q.; Zhi, Q.M.; Li, C.L.; Wang, Y.Q.; et al. Epigenetic silencing of microRNA-149 in cancer-associated fibroblasts mediates prostaglandin E2/interleukin-6 signaling in the tumor microenvironment. *Cell. Res.* **2015**, *25*, 588–603.
81. Yu, F.; Zheng, Y.; Hong, W.; Chen, B.; Dong, P.; Zheng, J. MicroRNA 200a suppresses epithelial to mesenchymal transition in rat hepatic stellate cells via GLI family zinc finger 2. *Mol. Med. Rep.* **2015**, *12*, 8121–8128.
82. Guo, C.J.; Pan, Q.; Xiong, H.; Qiao, Y.Q.; Bian, Z.L.; Zhong, W.; Sheng, L.; Li, H.; Shen, L.; Hua, J.; et al. Dynamic expression of miR-126\* and its effects on proliferation and contraction of hepatic stellate cells. *FEBS Lett.* **2013**, *29*, 3792–3801.
83. Zheng, J.; Lin, Z.; Dong, P.; Lu, Z.; Gao, S.; Chen, X.; Wu, C.; Yu, F.; et al. Activation of hepatic stellate cells is suppressed by microRNA-150. *Int. Jo. Mol. Med.* **2013**, *32*, 17–24.
84. Ji, J.; Zhang, J.; Huang, G.; Qian, J.; Wang, X.; Mei, S. Over-expressed microRNA-27a and 27b influence fat accumulation and cell proliferation during rat hepatic stellate cell activation. *FEBS Lett.* **2009**, *583*, 759–766.
